# Supplementary material
Source: Springer Nature journal article supplement (https://www.springermedizin.de/resource/supplementary/12957_2011_966_MOESM1_ESM.pdf/9562050)

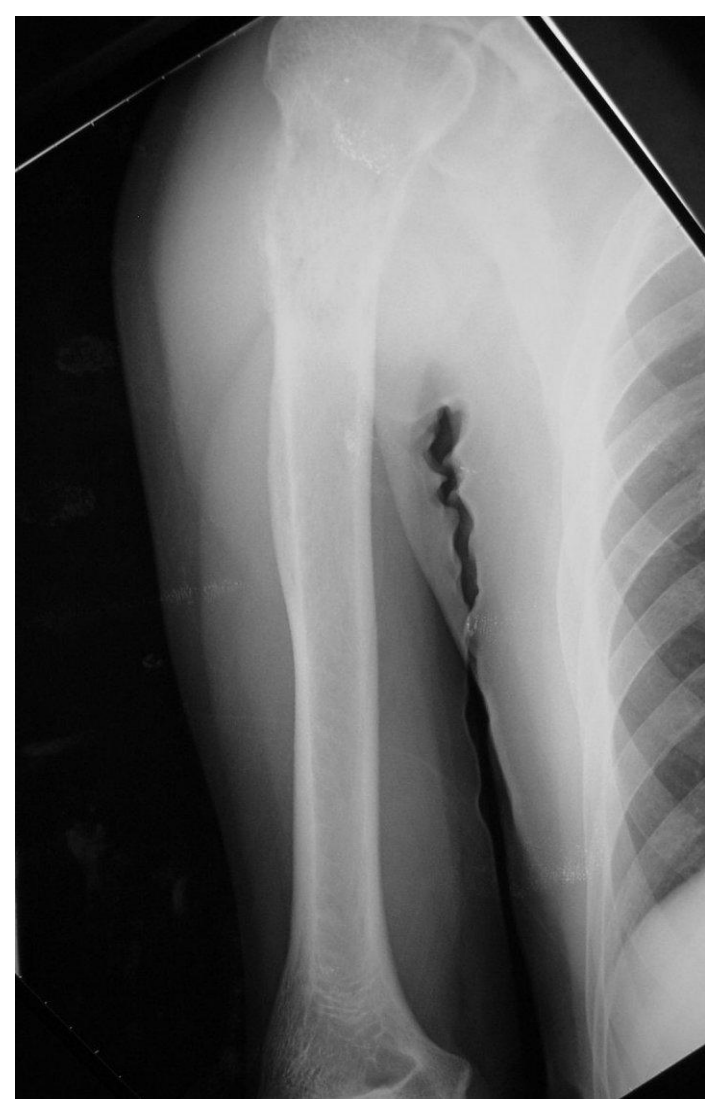

Plain X-ray

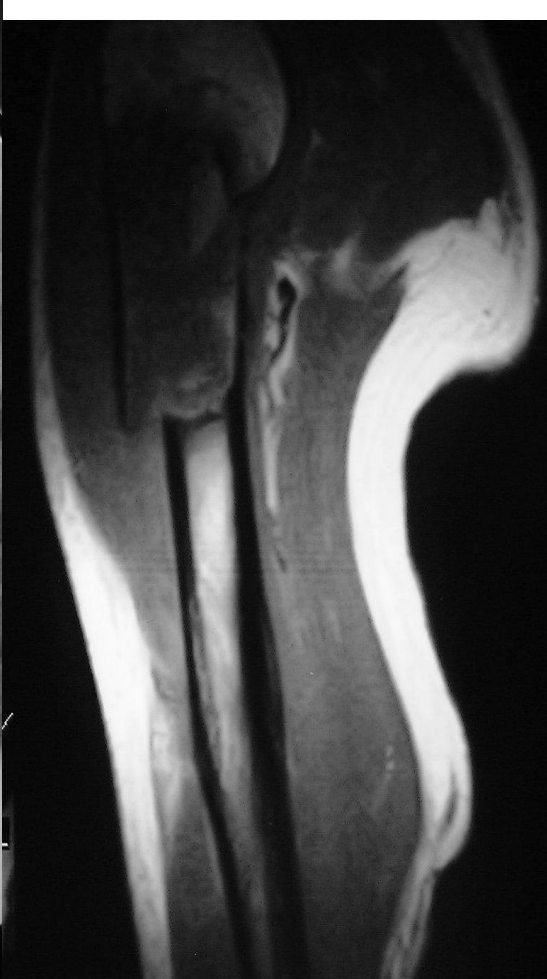

MRI (T1)

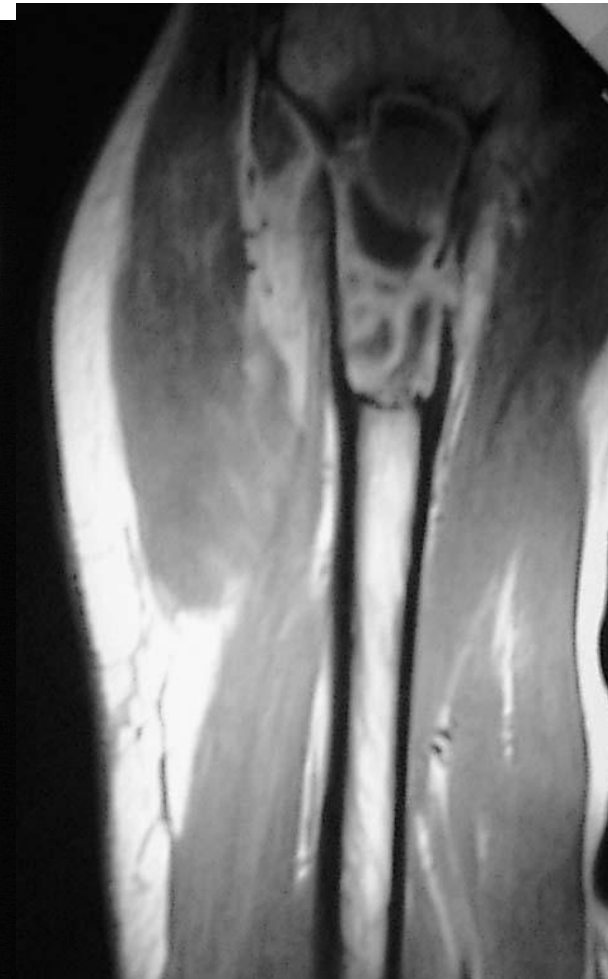

MRI (T1 - Gd)

Supplement: MOESM1 [file 9562050]
